# Supplementary figures and images for: Serum metabolome indicators of early childhood development in the Brazilian National Survey on Child Nutrition (ENANI-2019)
Source: eLife journal article supplement (doi:10.7554/elife.97982), 2025-01-15

**A****Mode of delivery**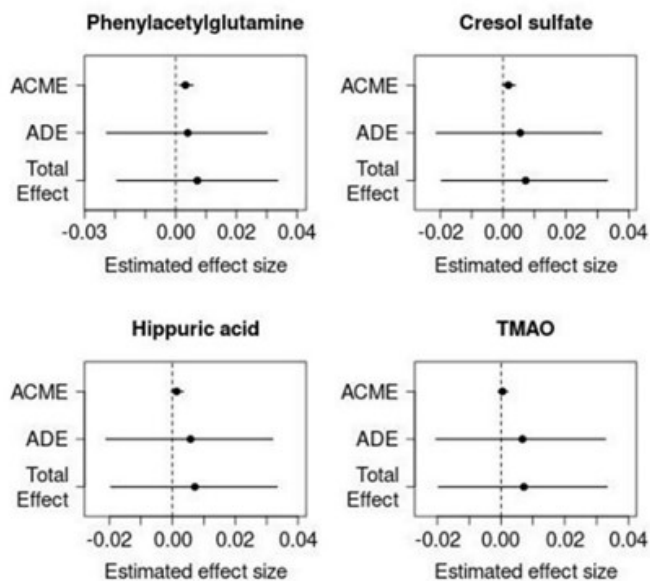**B****Child diet quality**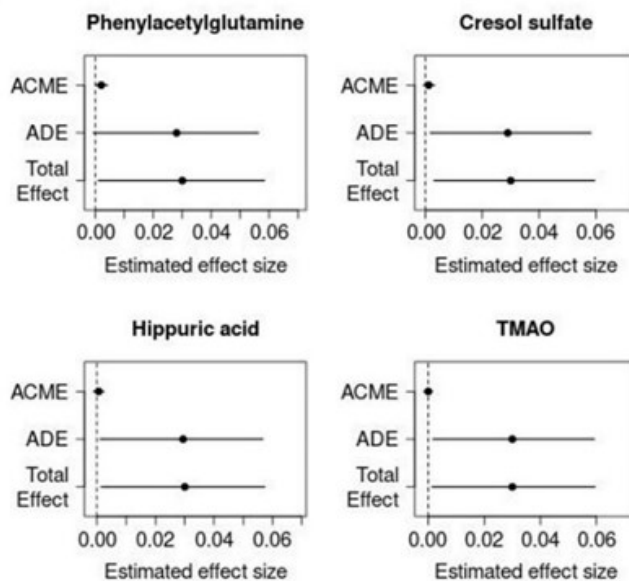**C****Child fiber intake**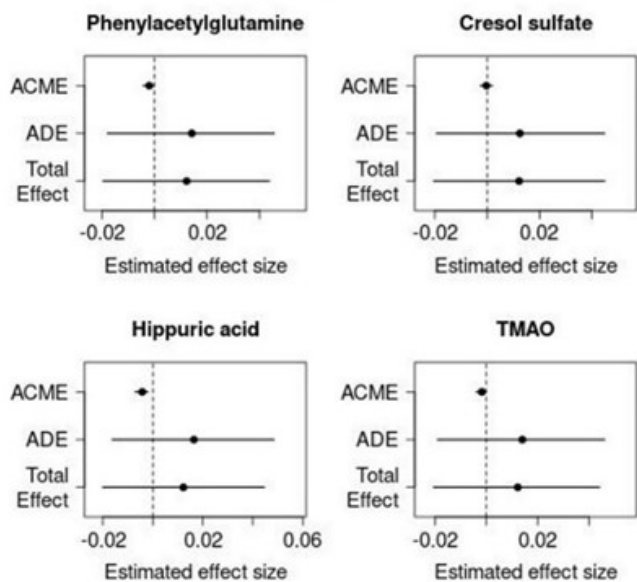

Supplement: supp [file elife-97982-supp-v1.zip]
